# Supplementary material for: Origins of Neural Progenitor Cell-Derived Axons Projecting Caudally after Spinal Cord Injury
Source: PubMed Central journal article supplement — Stem Cell Reports. 2019 Jun 13;13(1):105–14. doi: 10.1016/j.stemcr.2019.05.011 (PMC6626851; doi:10.1016/j.stemcr.2019.05.011), 2019-06-13
Supplement: mmc1.pdf [file mmc1.pdf]

**Stem Cell Reports, Volume 13**

**Supplemental Information**

**Origins of Neural Progenitor Cell-Derived Axons Projecting Caudally  
after Spinal Cord Injury**

**Paul Lu, Wallace Gomes-Leal, Selin Anil, Gabriel Dobkins, J. Russell Huie, Adam R. Ferguson, Lori Graham, and Mark Tuszynski**

## Supplemental Information

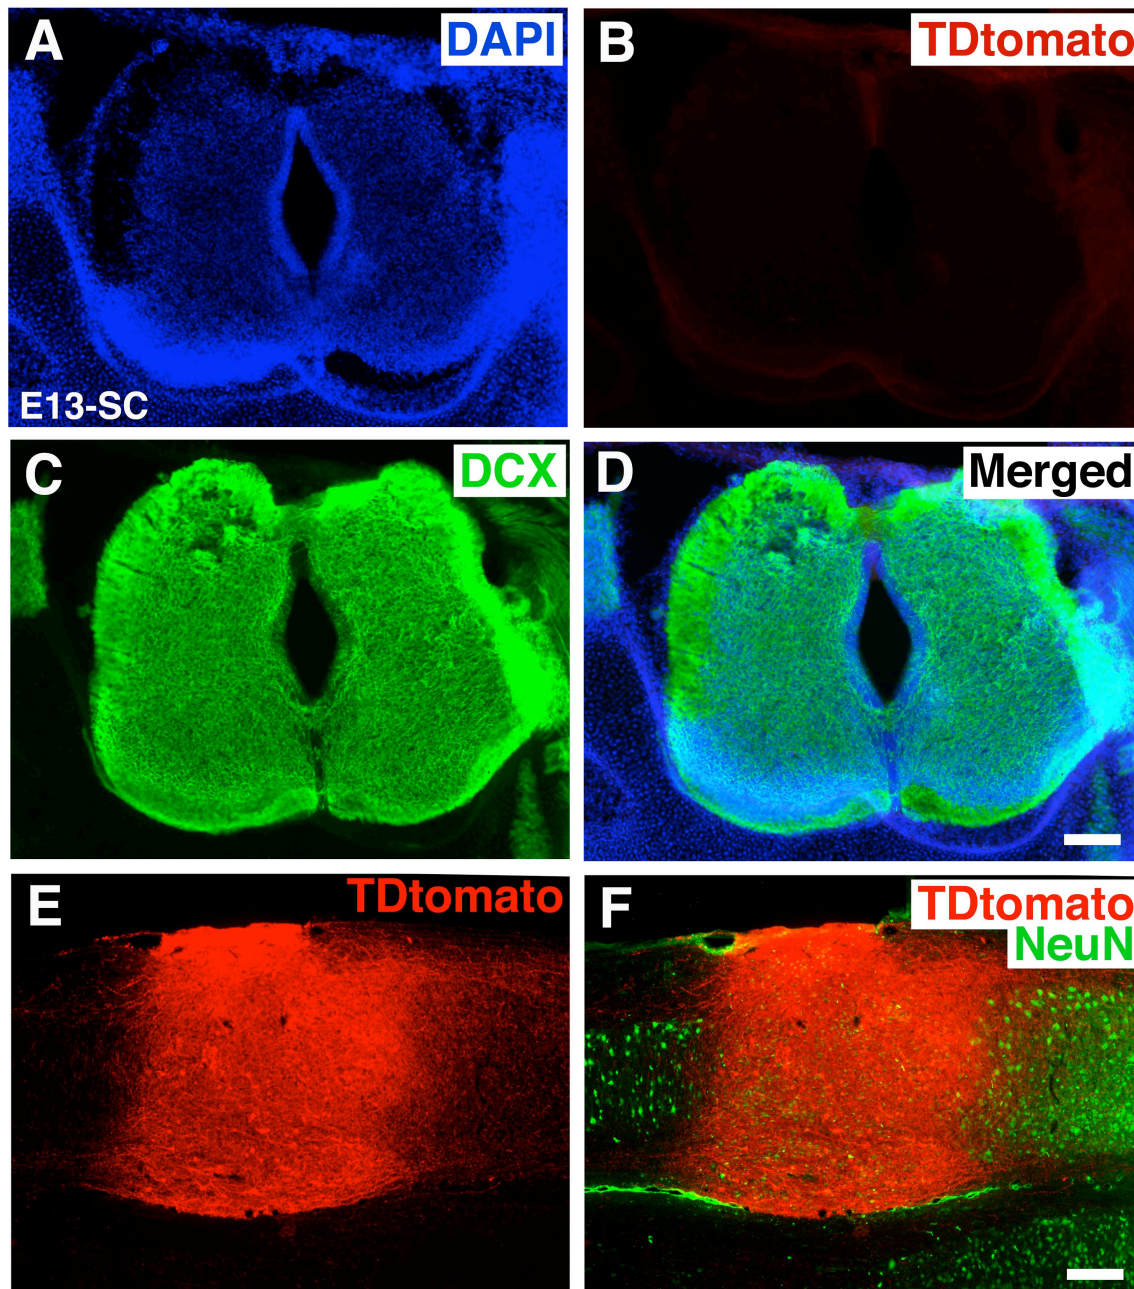

**Suppl. Fig. 1:** (A-D) Immunolabeling for **TD-tomato** and doublecortin (**DCX**) in a coronal mid-cervical spinal cord section from Ai9 mouse showing no expression of **TD-tomato** in the absence of Cre recombinase. **DAPI** labeling is blue. (E-F) A positive control label for **TD-Tomato** is shown in an animal that received a Cre-dependent **TD-Tomato** expressing cell graft, followed by Cre injection into the caudal spinal cord. **NeuN** labeling in F is green. Scale bar = 120  $\mu\text{m}$  (A-D); 230  $\mu\text{m}$  (E-F).
